# Supplementary material
Source: PubMed Central journal article supplement (PMC8324046)

# Appendix: Individual Sensory Scores

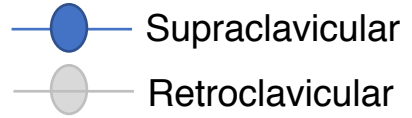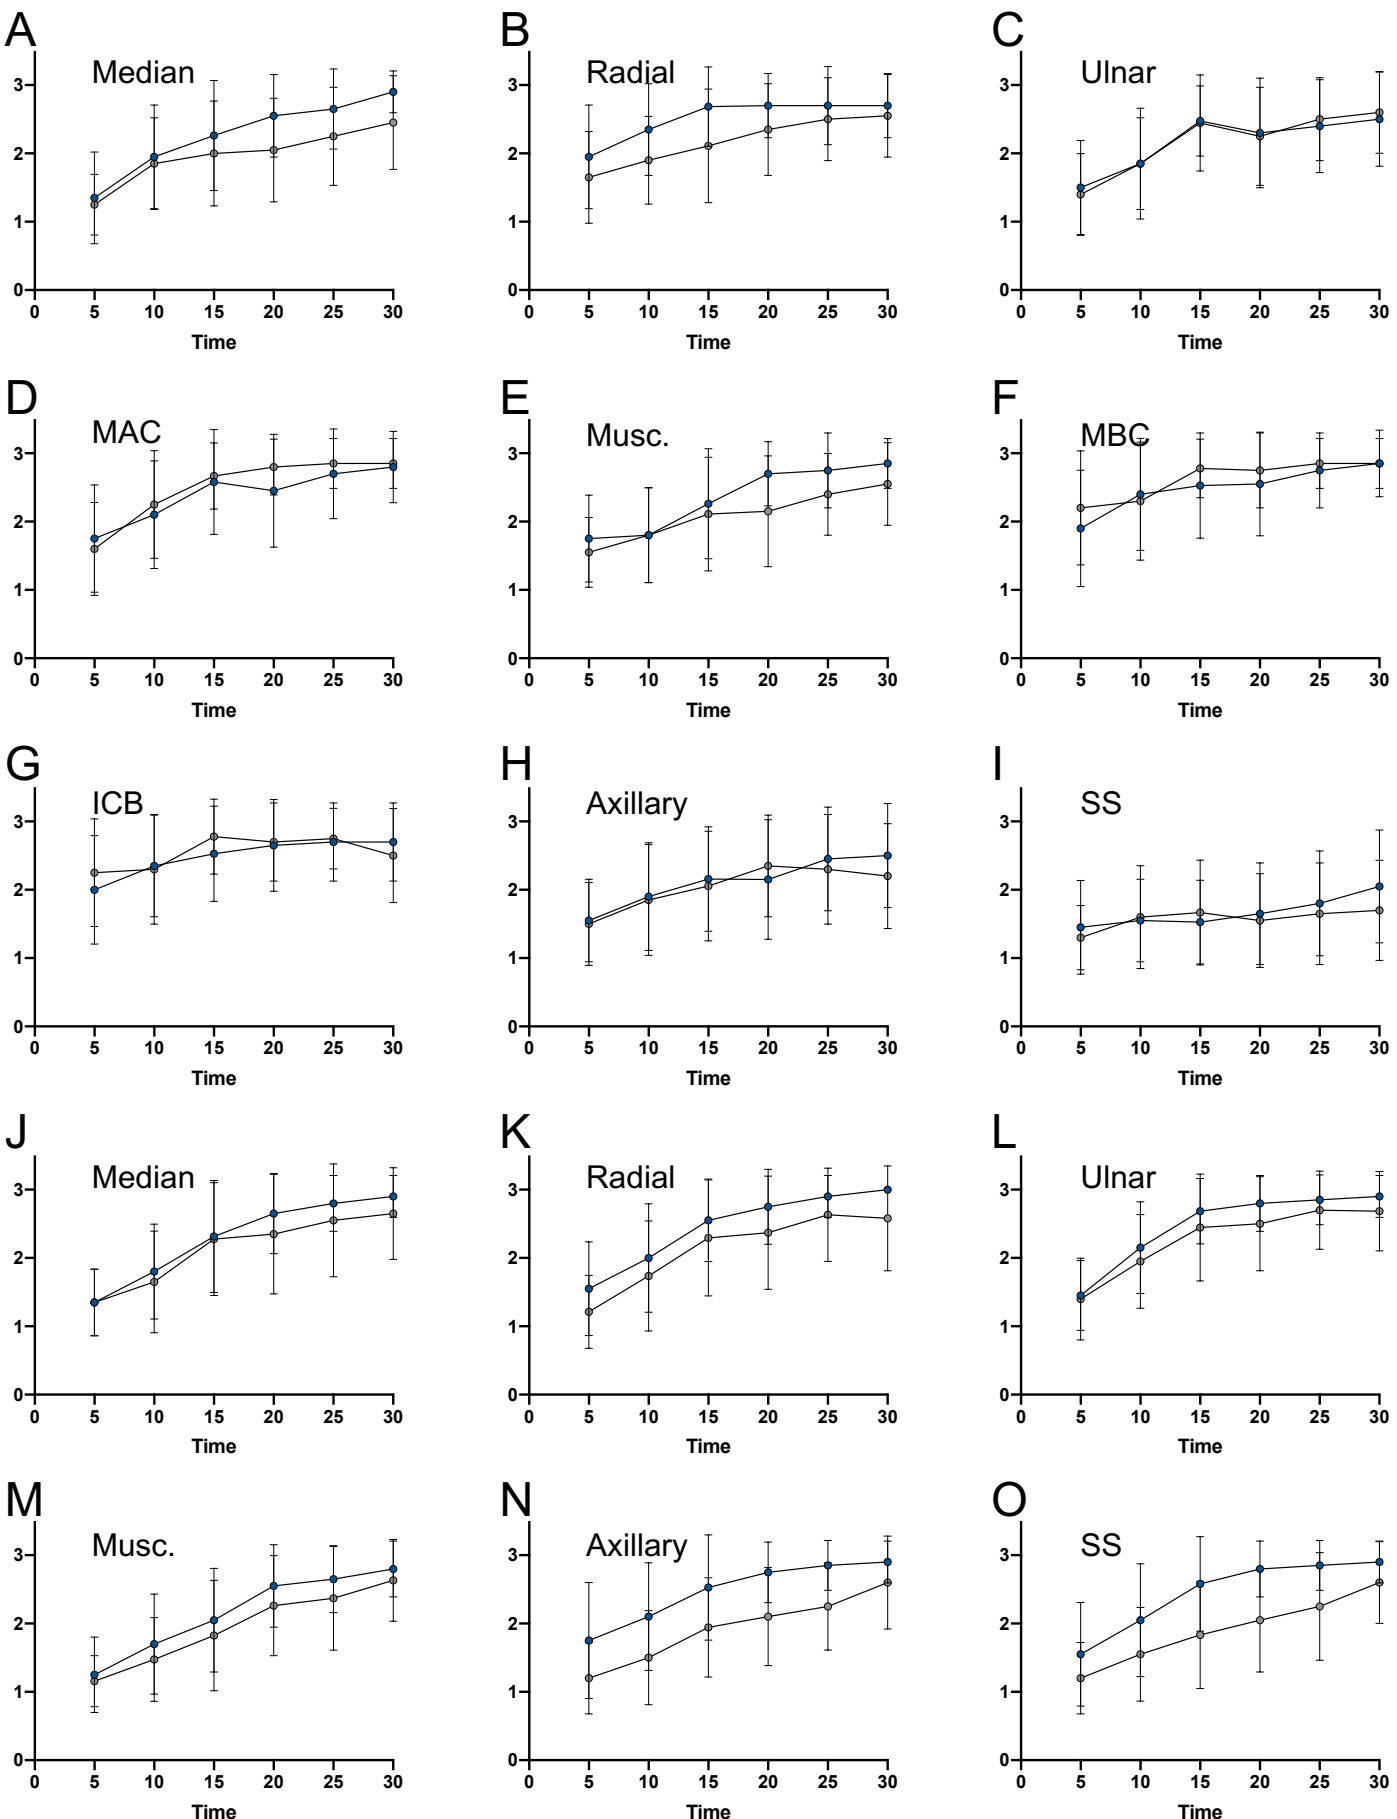

Supplement: NIHMS1722737-supplement-Appendix_figure.pdf [file NIHMS1722737-supplement-Appendix_figure.pdf]
